# Supplementary material for: MicroRNA-223 Attenuates Hypoxia-induced Vascular Remodeling by Targeting RhoB/MLC2 in Pulmonary Arterial Smooth Muscle Cells
Source: PubMed Central journal article supplement (PMC4848472; doi:10.1038/srep24900), 2016-04-28
Supplement: srep24900-s1.pdf [file srep24900-s1.pdf]

## MicroRNA-223 Attenuates Hypoxia-induced Vascular Remodeling by Targeting RhoB/MLC2 in Pulmonary Arterial Smooth Muscle Cells

Yan Zeng<sup>1,2†</sup>, Xiaoying Zhang<sup>1†</sup>, Kang Kang<sup>3†</sup>, Jidong Chen<sup>1</sup>, Zhiqin Wu<sup>1</sup>, Jinyong Huang<sup>1</sup>, Wenju Lu<sup>4</sup>, Yuqin Chen<sup>4</sup>, Jie Zhang<sup>4</sup>, Zhiwei Wang<sup>5</sup>, Yujia Zhai<sup>5</sup>, Junle Qu<sup>2</sup>, Ramaswamy Ramchandran<sup>6</sup>, J. Usha Raj<sup>6</sup>, Jian Wang<sup>4,7\*</sup>, Deming Gou<sup>1\*</sup>

### Supplemental Figures and Figure Legends

**Supplemental Figure S1.** Quantitative real-time PCR showing increased expression of miR-223 in rat and human PASMC transfected with miR-223 mimic (miR-223), compared with its scramble control (miR-Con). Data are shown as mean  $\pm$  SE, \*\* $p$ <0.01.

**Supplemental Figure S2.** (A) Relative miR-223 levels measured by quantitative PCR in cells transfected with inhibitor against miR-223 (anti-223) and its scramble control (anti-Con). (B) EdU incorporation assay showing proliferation activity of miR-223 inhibited cells and its control cells under normoxia. The data above are shown as means  $\pm$  SE, \* $p$ <0.05 and \*\* $p$ <0.01 vs anti-Con. (C) Cell proliferation was determined by PCNA immunoblotting.  $\beta$ -actin was used as loading control.

### Supplemental Figure S1.

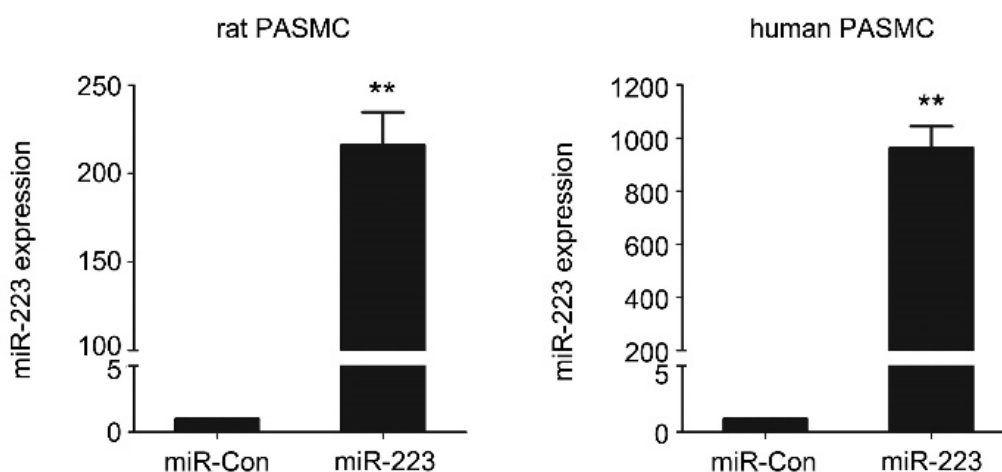

Supplemental Figure S2.

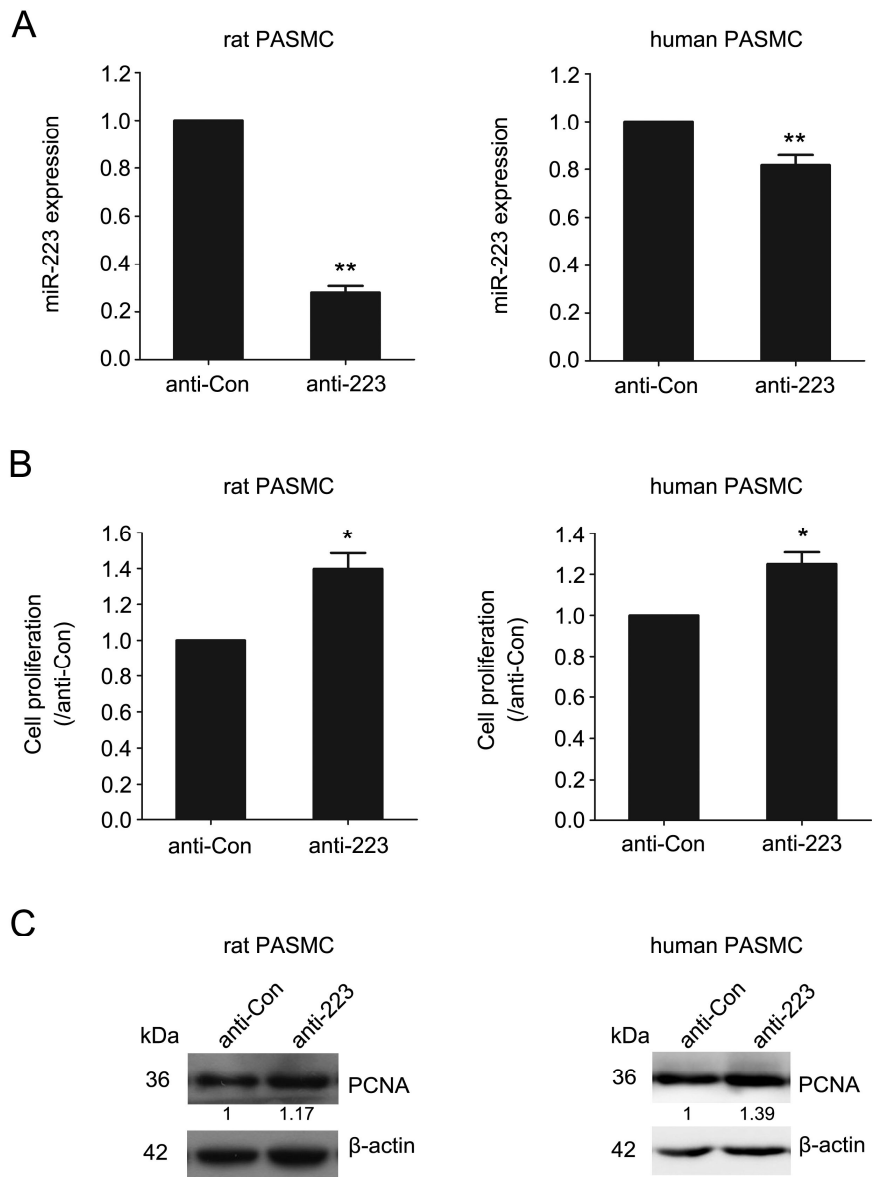

## Supplemental Tables

**Table S1.** The information of the first batch of CHD-PAH patients and healthy donors

| Sample ID | Gender | Age | Diagnosis                                  | $2^{-\Delta Ct}$ |
|-----------|--------|-----|--------------------------------------------|------------------|
| 1         | Male   | 10  | VSD, Preoperative, PH                      | 0.154            |
| 2         | Male   | 2   | VSD, ASD, PH                               | 2.827            |
| 3         | Male   | 4   | VSD, Preoperative                          | 1.327            |
| 4         | Male   | 0.5 | VSD, Preoperative                          | 0.402            |
| 5         | Male   | 2   | VSD, Preoperative                          | 1.353            |
| 6         | Male   | 4   | CHD, VSD, Preoperative                     | 0.552            |
| 7         | Male   | 0.8 | VSD, CHD, PFO                              | 1.391            |
| 8         | Male   | 0.5 | VSD                                        | 0.252            |
| 9         | Male   | 1   | CHD, VSD                                   | 1.646            |
| 10        | Male   | 37  | ASD                                        | 0.400            |
| 11        | Male   | 20  | ASD, Preoperative                          | 0.825            |
| 12        | Male   | 20  | ASD, Postoperative, Eisenmenger's syndrome | 1.509            |
| 13        | Male   | 28  | ASD                                        | 0.144            |
| 14        | Male   | 27  | Healthy donor                              | 0.407            |
| 15        | Male   | 48  | Healthy donor                              | 0.660            |
| 16        | Male   | 44  | Healthy donor                              | 0.856            |
| 17        | Male   | 28  | Healthy donor                              | 0.274            |
| 18        | Male   | 27  | Healthy donor                              | 0.499            |
| 19        | Male   | 30  | Healthy donor                              | 0.263            |
| 20        | Male   | 38  | Healthy donor                              | 1.499            |
| 21        | Male   | 34  | Healthy donor                              | 0.771            |
| 22        | Male   | 23  | Healthy donor                              | 1.027            |
| 23        | Male   | 24  | Healthy donor                              | 0.577            |
| 24        | Male   | 32  | Healthy donor                              | 1.125            |
| 25        | Male   | 25  | Healthy donor                              | 1.888            |
| 26        | Male   | 37  | Healthy donor                              | 0.339            |
| 27        | Female | 65  | ASD, Severe PAH, Postoperative             | 0.336            |
| 28        | Female | 49  | VSD, Preoperative                          | 0.161            |
| 29        | Female | 39  | VSD, Extremely Severe PAH                  | 0.362            |
| 30        | Female | 22  | ASD, Preoperative                          | 0.394            |
| 31        | Female | 15  | VSD, Preoperative                          | 0.304            |
| 32        | Female | 28  | VSD, Preoperative                          | 0.468            |
| 33        | Female | 46  | CHD, MVR, Postoperative                    | 0.953            |
| 34        | Female | 3   | VSD                                        | 1.834            |
| 35        | Female | 28  | VSD, Severe PAH                            | 0.161            |
| 36        | Female | 27  | VSD, Severe PAH                            | 0.430            |
| 37        | Female | 25  | ASD                                        | 0.644            |
| 38        | Female | 20  | VSD                                        | 1.190            |
| 39        | Female | 44  | VSD, Preoperative                          | 0.841            |

|    |        |    |                                    |       |
|----|--------|----|------------------------------------|-------|
| 40 | Female | 27 | VSD, Severe PAH                    | 0.893 |
| 41 | Female | 39 | VSD, Preoperative                  | 0.514 |
| 42 | Female | 15 | VSD, Preoperative                  | 1.462 |
| 43 | Female | 19 | ASD +VSD, Preoperative, Severe PAH | 0.199 |
| 44 | Female | 26 | Healthy donor                      | 1.577 |
| 45 | Female | 36 | Healthy donor                      | 1.375 |
| 46 | Female | 39 | Healthy donor                      | 0.245 |
| 47 | Female | 43 | Healthy donor                      | 1.144 |
| 48 | Female | 27 | Healthy donor                      | 0.497 |
| 49 | Female | 28 | Healthy donor                      | 0.832 |
| 50 | Female | 30 | Healthy donor                      | 0.961 |
| 51 | Female | 28 | Healthy donor                      | 1.069 |
| 52 | Female | 32 | Healthy donor                      | 1.343 |
| 53 | Female | 27 | Healthy donor                      | 1.891 |
| 54 | Female | 26 | Healthy donor                      | 1.977 |
| 55 | Female | 44 | Healthy donor                      | 1.824 |
| 56 | Female | 22 | Healthy donor                      | 1.374 |
| 57 | Female | 35 | Healthy donor                      | 2.969 |
| 58 | Female | 27 | Healthy donor                      | 1.376 |
| 59 | Female | 27 | Healthy donor                      | 1.452 |
| 60 | Female | 33 | Healthy donor                      | 0.916 |

**Notes:** VSD, ventricular septal defect; ASD, atrial septal defect; CHD, congenital heart disease; PFO, Patent Foramen Ovale; MVR, mitral valve replacement.

**Table S2.** The information of the second batch of CHD-PAH patients and healthy donors

| Sample ID | Gender | Age | Diagnosis                  | Remarks                             | 2 <sup>-ACt</sup> |
|-----------|--------|-----|----------------------------|-------------------------------------|-------------------|
| 1         | Male   | 35  | ASD, Postoperative         |                                     | 2.431             |
| 2         | Male   | 60  | MS, Moderate PH            |                                     | 1.130             |
| 3         | Male   | 42  | VSD, Moderate-Severe       |                                     | 0.664             |
| 4         | Male   | 32  | VSD                        |                                     | 2.190             |
| 5         | Male   | 5   | ASD                        |                                     | 1.912             |
| 6         | Male   | 37  | ASD                        |                                     | 1.334             |
| 7         | Male   | 42  | VSD, Moderate-Severe       | Cardiac Catheterization,91/46 mmHg  | 0.755             |
| 8         | Male   | 35  | Healthy donor              |                                     | 1.498             |
| 9         | Male   | 58  | Healthy donor              |                                     | 1.155             |
| 10        | Male   | 42  | Healthy donor              |                                     | 2.430             |
| 11        | Male   | 32  | Healthy donor              |                                     | 3.086             |
| 12        | Male   | 6   | Healthy donor              |                                     | 2.528             |
| 13        | Male   | 37  | Healthy donor              |                                     | 5.457             |
| 14        | Male   | 42  | Healthy donor              |                                     | 2.013             |
| 15        | Female | 25  | PDA, Severe                | Cardiac Catheterization,105/68 mmHg | 0.876             |
| 16        | Female | 35  | IPAH, Severe               | B-scan ultrasonography,106/56 mmHg  | 0.675             |
| 17        | Female | 27  | ASD, Mild                  | B-scan ultrasonography, 34 mmHg     | 1.145             |
| 18        | Female | 29  | ASD, Severe                | B-scan ultrasonography, 93/160 mmHg | 2.378             |
| 19        | Female | 24  | ASD, Mild                  | B-scan ultrasonography, 34 mmHg     | 0.895             |
| 20        | Female | 18  | ASD, Mild                  | B-scan ultrasonography, 37 mmHg     | 4.415             |
| 21        | Female | 20  | VSD, Postoperative, Severe |                                     | 2.969             |
| 22        | Female | 31  | VSD, Severe                |                                     | 0.737             |
| 23        | Female | 33  | ASD, Postoperative         |                                     | 1.135             |
| 24        | Female | 37  | ASD, Moderate-Severe       |                                     | 6.193             |
| 25        | Female | 42  | MSI                        | B-scan ultrasonography, 42 mmHg     | 1.328             |
| 26        | Female | 38  | MSI                        | B-scan ultrasonography, 50 mmHg     | 3.823             |
| 27        | Female | 45  | ASD                        | B-scan ultrasonography, 42 mmHg     | 1.438             |
| 28        | Female | 45  | ASD                        | B-scan ultrasonography, 39 mmHg     | 1.982             |
| 29        | Female | 32  | ASD                        | B-scan ultrasonography, 38 mmHg     | 0.943             |
| 30        | Female | 64  | MSI                        | B-scan ultrasonography, 35 mmHg     | 1.770             |
| 31        | Female | 30  | ASD, Moderate-Severe       | B-scan ultrasonography, 66 mmHg     | 1.554             |
| 32        | Female | 25  | Healthy donor              |                                     | 14.407            |
| 33        | Female | 35  | Healthy donor              |                                     | 2.812             |
| 34        | Female | 27  | Healthy donor              |                                     | 9.941             |
| 35        | Female | 29  | Healthy donor              |                                     | 4.060             |
| 36        | Female | 24  | Healthy donor              |                                     | 8.008             |
| 37        | Female | 16  | Healthy donor              |                                     | 4.646             |
| 38        | Female | 21  | Healthy donor              |                                     | 3.451             |
| 39        | Female | 31  | Healthy donor              |                                     | 3.914             |
| 40        | Female | 33  | Healthy donor              |                                     | 7.515             |

|    |        |    |               |  |       |
|----|--------|----|---------------|--|-------|
| 41 | Female | 37 | Healthy donor |  | 4.040 |
| 42 | Female | 43 | Healthy donor |  | 3.414 |
| 43 | Female | 38 | Healthy donor |  | 3.242 |
| 44 | Female | 45 | Healthy donor |  | 4.382 |
| 45 | Female | 45 | Healthy donor |  | 1.537 |
| 46 | Female | 30 | Healthy donor |  | 2.578 |
| 47 | Female | 63 | Healthy donor |  | 3.754 |
| 48 | Female | 30 | Healthy donor |  | 5.457 |

**Notes:** ASD, atrial septal defect; MS, mitral stenosis; VSD, ventricular septal defect; PDA, Patent Ductus Arteriosus; IPAH, Idiopathic Pulmonary Arterial Hypertension; MSI, mitral stenosis and insufficiency.
